# Supplementary material
Source: PubMed Central journal article supplement (PMC6217396)
Supplement: pnas.1806425115.sapp.pdf [file pnas.1806425115.sapp.pdf]

## Supplementary Information for

### **Prevalent reliance of bacterioplankton on exogenous vitamin B1 and precursor availability**

Ryan W. Paerl; John Sundh; Demeng Tan; Sine L. Svenningsen; Samuel Hylander; Jarone Pinhassi; Anders F. Andersson; Lasse Riemann

Ryan W. Paerl  
Email: [rpaerl@ncsu.edu](mailto:rpaerl@ncsu.edu)

#### **This PDF file includes:**

Supplementary text  
Figures S1 to S6  
Tables S1 to S11  
References for SI reference citations

#### **Other supplementary materials for this manuscript include the following:**

SI Datasets: Dataset S1 to S6

## Supplementary Information.

### Methods.

**Correlation analyses.** Spearman rank correlations between B1-related gene abundance and corresponding environmental data from times of LMO metagenome sampling (1) were calculated using the spearmanr function in the scipy python package with nan-policy set to 'omit'. p-values were corrected with the step-down method using Bonferroni adjustments (implemented as "holm" in the python package statsmodels). The data analyzed were % normalized gene abundance values and raw environmental values, except that DOC values >400  $\mu\text{M}$  were set to NA (as these were identified as extreme outliers).

**ThiE amino acid tree generation.** Nineteen ThiE amino acid sequences were retrieved from UNIPROT and aligned using the Clustal Omega program (<http://www.uniprot.org/align/>). A Maximum Likelihood tree was generated in MEGA7 (2) from the aligned sequences using a Poisson correction model (3). The tree with the highest log likelihood is shown. Initial tree(s) for the heuristic search were obtained automatically by applying Neighbor-Join and BioNJ algorithms to a matrix of pair-wise distances estimated using a JTT model, and then selecting the topology with superior log likelihood value. A total of 239 positions were used in for the tree generation process.

**Calculation of B1 diffusive flux to 1  $\mu\text{m}$  diameter bacterioplankton cell, after Zehr, Weitz, and Joint 2017 (4).**

*B1 molecules per  $\mu\text{m}^3$  of water (x), assuming a concentration (p) of 1 pM B1:*

$$x = 0.001 \text{ (nmol/L)} * 10^{-9} \text{ (mol/nmol)} * 10^{-3} \text{ (L/cm}^3\text{)} * 10^{-12} \text{ (cm}^3/\mu\text{m}^3\text{)} * 6.02 \times 10^{23} \text{ (molecules/mol)}$$

$$x = 6 \times 10^{-4} \text{ B1 molecules}/\mu\text{m}^3, \text{ which is } 6 \times 10^8 \text{ B1 molecules}/\text{cm}^3$$

*Daily diffusive flux (J) of B1 to a (assumed spherical) bacterioplankton cell with a radius (r) of 1  $\mu\text{m}$  and a diffusion coefficient (D) for citrate (in place of B1(5)):*

$$J \approx 4\pi * D * r * p * 86400 \text{ s/d}$$

$$J \approx 4\pi * (3.22 \times 10^{-6} \text{ cm}^2/\text{s}) * (1 \times 10^{-3} \text{ cm}) * (6 \times 10^8 \text{ B1 molecules}/\text{cm}^3) * 86400 \text{ s/d}$$

$$J \approx 2.16 \times 10^6 \text{ B1 molecules/d}$$

*Cell demand for Vibrio anguillarum PF430-3 is maximally  $5.3 \times 10^2$  B1 molecules/cell (Table S7). Dividing the daily flux of B1 by cell demand (given one division per day) yields an estimate of excess B1 molecules encountered by the cell:*

$$\text{Ratio} = (2.16 \times 10^6 \text{ B1 molecules/d}) / (5.3 \times 10^2 \text{ B1 molecules/d}) = \sim 4.0 \times 10^3 \text{ excess B1 molecules reaching the cell via diffusion}$$

## Supplementary Figures

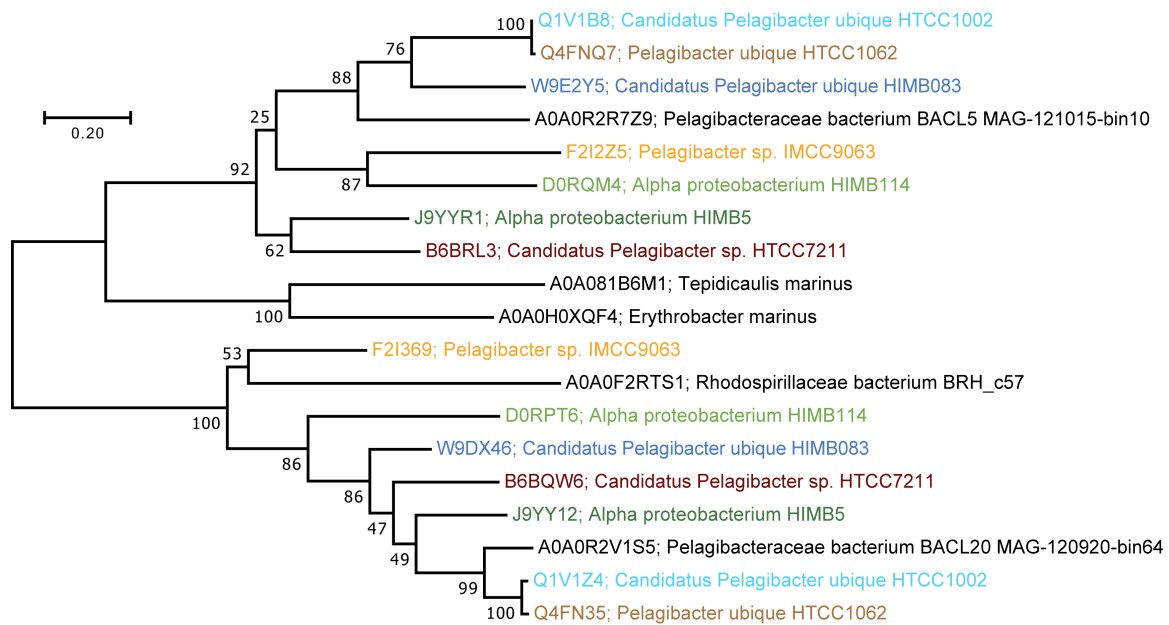

Figure S1. An unrooted maximum likelihood tree of thiamine monophosphate synthase (ThiE) amino acid sequences from *Pelagibacterales* spp. and *Alphaproteobacterial* relatives. The clustering of ThiE sequences highlights multiple isoforms of ThiE exist within (e.g. HTCC1002) and between (BACL5 MAG versus BACL20 MAG) the populations. UNIPROT ID's are listed in front of strain names. Colored isolate names are those recognized to possess multiple ThiE sequences. Bootstrap values >50 (%) noted at nodes are derived from 1000 replicate trees. The plotted scale represents the number of residue (amino acid) substitutions (0.20) per site.

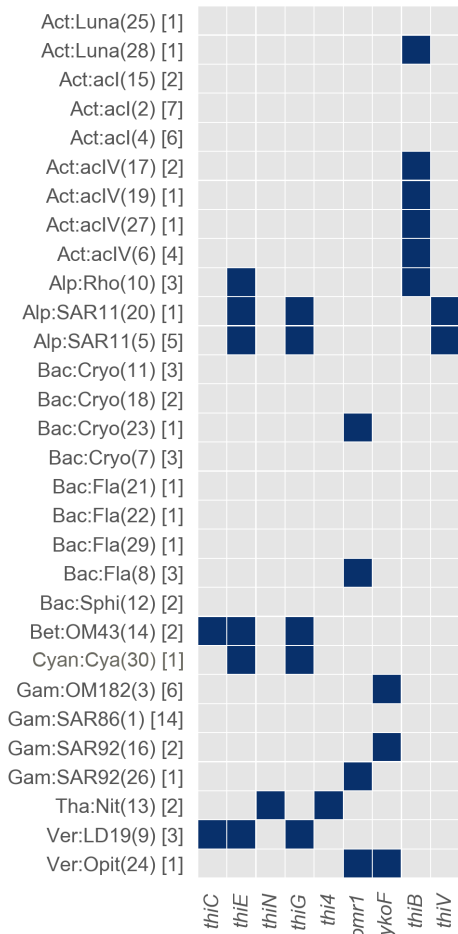

Figure S2. Different B1-related transporters were detected in LMO MAG clusters – including one cluster with multiple transporter types (Ver:Opit(24) – possessing *omr1* and *ykoF* genes). Blue squares indicate detection of the protein-encoding gene.

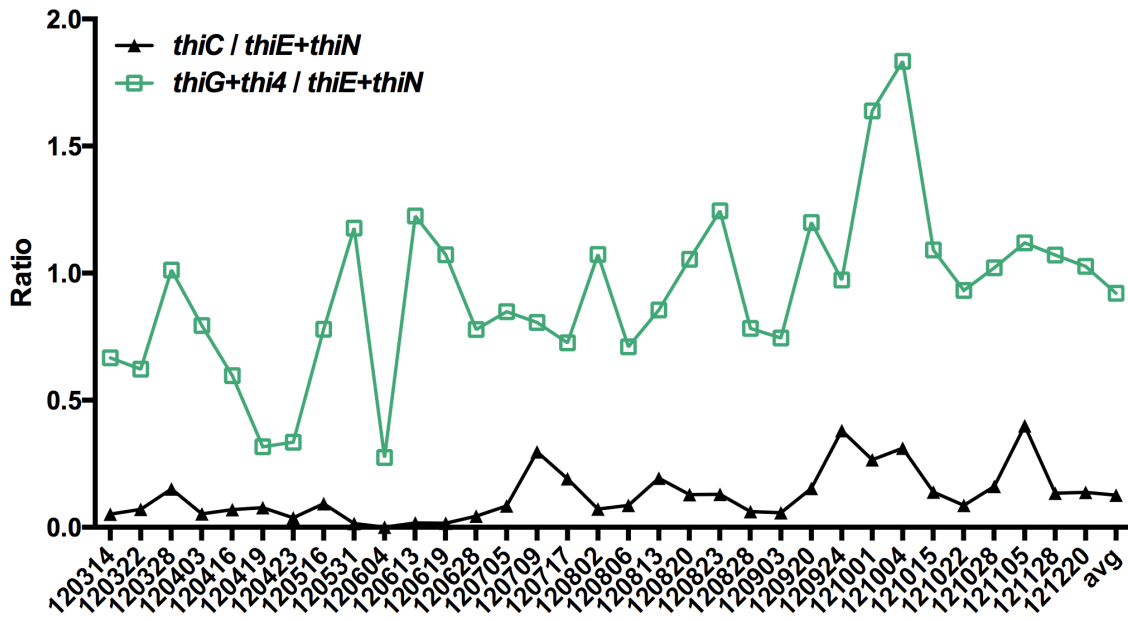

Figure S3. Ratios of pyrimidine B1 biosynthesis gene *thiC* to thiamine monophosphate genes (*thiE* + *thiN*), and thiazole B1 biosynthesis genes (*thiG* + *thi4*) to thiamine monophosphate genes (*thiE* + *thiN*) across LMO metagenomes (timestamp format is: YR:MO:DA; e.g. March 14, 2012 = 120314). The final data point on the far right represents the average (avg) ratio across all metagenomes.

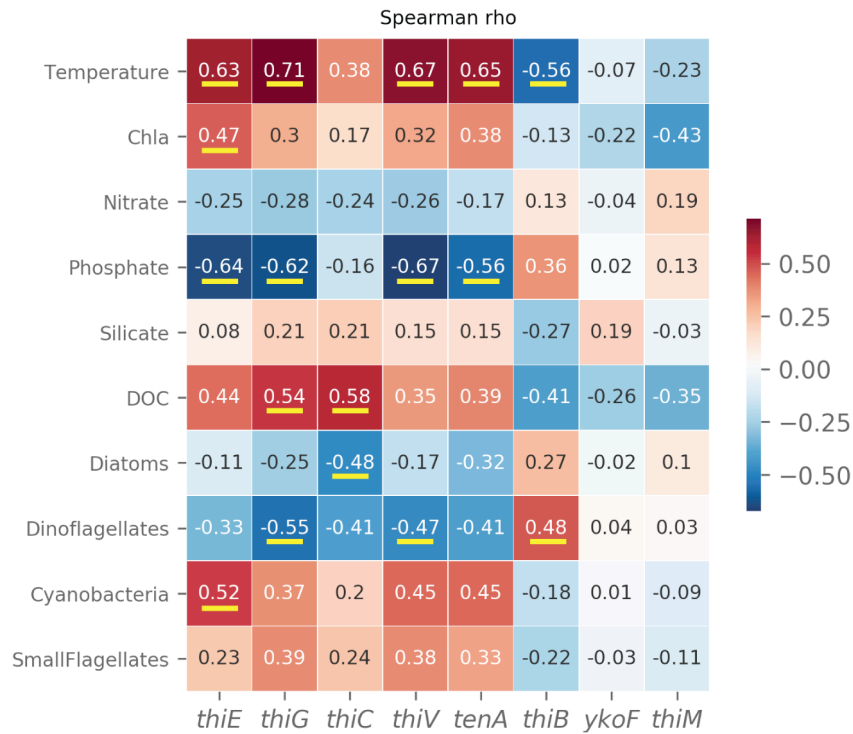

Figure S4. Spearman rank correlations between abundance (% normalized gene abundance) of B1 biosynthesis, salvage, and uptake genes identified in the LMO metagenomes, and measured environmental parameters (1). Values indicate the type of correlation (Spearman rho; red being positive and blue being negative). Values with a yellow underline are significant correlations with respective p values <0.05.

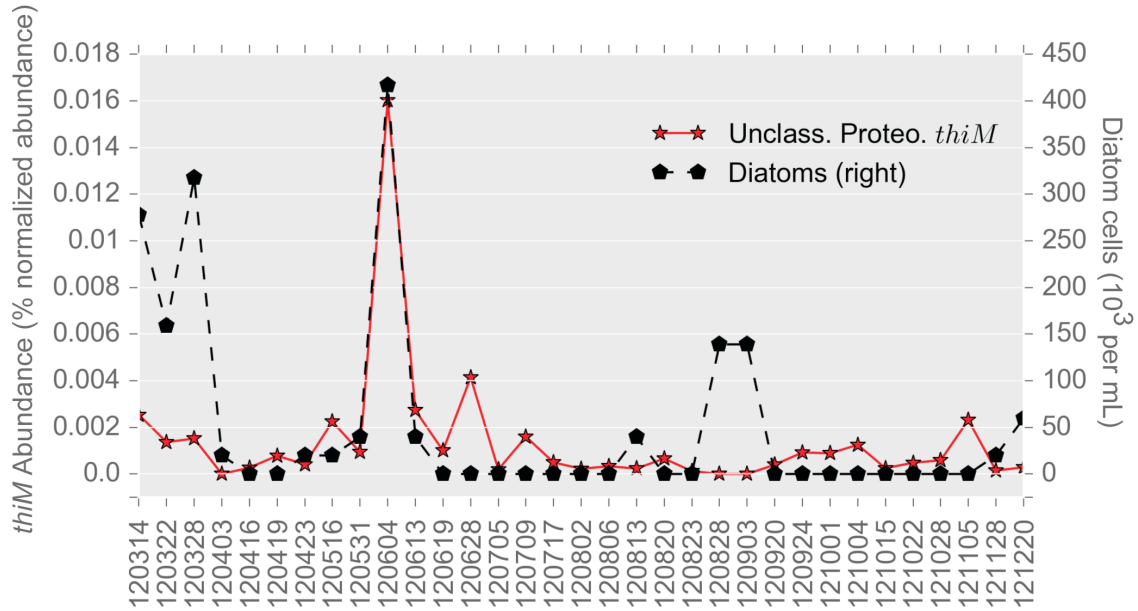

Figure S5. Abundance (% normalized abundance) of unclassified Proteobacterial *thiM* genes and total diatom cell abundances across the LMO dataset. A pronounced short-term peak in *thiM* abundance occurred in early summer, coinciding a notable peak in diatom cell abundance. Sampling dates (in two digit year, month, and day format) linked to respective metagenomes are presented along the x-axis.



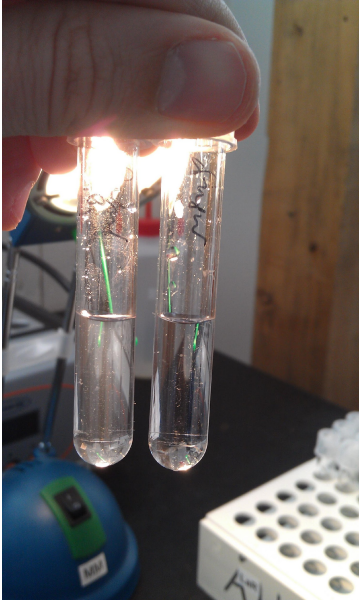

Figure S6. A photograph of the B1-auxotrophic *V. anguillarum* PF430-3  $\Delta$ ThiE mutant line growing to high concentrations when provided 1 nM B1 (left) versus a no addition negative control (right). Further experiments confirmed PF430-3  $\Delta$ ThiE grows only upon intact B1 (Table S5).

## Supplementary Tables

Table S1. Protein models used in surveys for protein sequences attributed to B1 biosynthesis, uptake, or salvage.

| <i>Protein Target</i> | <i>Protein Model</i> |
|-----------------------|----------------------|
| ThiN                  | PF10120              |
| Thi4                  | TIGR00292            |
| ThiC                  | TIGR00190            |
| ThiD                  | TIGR00097            |
| ThiE                  | TIGR00693            |
| TMP-TENI              | PF02581              |
| TenA                  | PF03070              |
| ThiM                  | TIGR00694            |
| TenA                  | TIGR04306            |
| ThiaminaseI           | TIGR04541            |
| CytX                  | TIGR02358            |
| ThiB 1                | TIGR01254            |
| ThiB 2                | TIGR01276            |
| ThiP                  | TIGR01253            |
| ThiQ                  | TIGR01277            |
| ThiT                  | TIGR02357            |
| ThiW                  | TIGR02359            |
| YkoF                  | PF07615              |
| SSUA/Thi5/NMT1        | PF09084              |
| SSSP                  | PF00474              |
| ThiPerm               | PF02133              |
| ThiG                  | PF05690              |
| ThiY                  | thiY_custom          |
| ThiV                  | thiV_custom          |
| Omr1                  | omr1_custom          |
| ThiM                  | PF02110              |
| PnuC                  | TIGR01528            |

Table S2. Results from a B1-auxotrophy survey of 25 bacterial strains isolated from Baltic Sea surface waters. B1 was added in all surveys at a final concentration of 500 pM. A = Auxotrophy; P = Prototrophy.

| Strain ID | Class Affiliation          | Accession # | Proto./Auxo.? |
|-----------|----------------------------|-------------|---------------|
| BAL116    | <i>Actinobacteria</i>      | DQ063056    | A             |
| BAL246    | <i>Actinobacteria</i>      | DQ063182    | A             |
| BAL115    | <i>Actinobacteria</i>      | DQ063055    | A             |
| BAL248    | <i>Actinobacteria</i>      | DQ063184    | A             |
| BAL206    | <i>Actinobacteria</i>      | DQ063144    | P             |
| BAL209    | <i>Actinobacteria</i>      | AY962021    | A             |
| BAL96     | <i>Alphaproteobacteria</i> | DQ063036    | A             |
| BAL108    | <i>Alphaproteobacteria</i> | DQ063048    | P             |
| BAL100    | <i>Alphaproteobacteria</i> | DQ063040    | P             |
| BAL163    | <i>Alphaproteobacteria</i> | DQ063103    | P             |
| BAL176    | <i>Bacteroidetes</i>       | DQ063116    | P             |
| BAL241    | <i>Bacteroidetes</i>       | DQ063177    | P             |
| BAL180    | <i>Bacteroidetes</i>       | DQ063120    | P             |
| BAL64     | <i>Bacteroidetes</i>       | DQ063004    | P             |
| BAL268    | <i>Bacteroidetes</i>       | DQ063204    | A             |
| BAL242    | <i>Bacteroidetes</i>       | DQ063178    | P             |
| BAL162    | <i>Betaproteobacteria</i>  | DQ063102    | P             |
| BAL253    | <i>Betaproteobacteria</i>  | DQ063189    | P             |
| BAL110    | <i>Betaproteobacteria</i>  | DQ063050    | P             |
| BAL109    | <i>Betaproteobacteria</i>  | DQ063049    | P             |
| BAL361    | <i>Gammaproteobacteria</i> | KC140295    | P             |
| BAL286    | <i>Gammaproteobacteria</i> | AY972873    | P             |
| BAL66     | <i>Gammaproteobacteria</i> | DQ063006    | A             |
| BAL144    | <i>Gammaproteobacteria</i> | DQ063084    | P             |
| BAL67     | <i>Gammaproteobacteria</i> | DQ063007    | P             |

Table S3. Of 330 total surveyed complete bacterioplankton genomes, only 14 lack *thiE* (Bacteria) or *thiN* (Archaea) – encoding for thiamine monophosphate synthase.

| <i>IMG_taxid</i> | <i>Habitat</i> | <i>Kingdom</i> | <i>Species</i>                             | <i>thiE</i> | <i>thiN</i> |
|------------------|----------------|----------------|--------------------------------------------|-------------|-------------|
| 2504643007       | Fresh          | Bacteria       | <i>Candidatus Rhodoluna laticola</i>       | 0           | 0           |
| 644736368        | Fresh          | Bacteria       | <i>Flavobacteriaceae bacterium 3519-10</i> | 0           | 0           |
| 650377973        | Fresh          | Bacteria       | <i>Sphaerochaeta globosa</i>               | 0           | 0           |
| 2508501070       | Fresh          | Bacteria       | <i>Sphaerochaeta pleomorpha</i>            | 0           | 0           |
| 2503982041       | Marine         | Bacteria       | <i>Alpha Proteobacterium HIMB59</i>        | 0           | 0           |
| 2516143106       | Marine         | Bacteria       | <i>Francisella sp. FSC1006</i>             | 0           | 0           |
| 2511231080       | Marine         | Bacteria       | <i>Glaciecola nitratreducens</i>           | 0           | 0           |
| 639633025        | Marine         | Bacteria       | <i>Gramella forsetii</i>                   | 0           | 0           |
| 648028027        | Marine         | Bacteria       | <i>Maribacter sp. HTCC2170</i>             | 0           | 0           |
| 649633077        | Marine         | Bacteria       | <i>Oceanithermus profundus</i>             | 0           | 0           |
| 641228500        | Marine         | Bacteria       | <i>Petrotoga mobilis</i>                   | 0           | 0           |
| 638341218        | Marine         | Bacteria       | <i>Polaribacter sp. MED152</i>             | 0           | 0           |
| 646311950        | Marine         | Bacteria       | <i>Robiginitalea biformata</i>             | 0           | 0           |
| 2556921662       | Marine         | Bacteria       | <i>Spirochaeta sp. L21-RPul-D2</i>         | 0           | 0           |

Table S4. A table of bacterioplankton isolates with publically available complete genome sequences that possess >1 copy of thiazole synthase *thiG* or *thi4*. The detection of genes is highlighted in blue. Respective symbols indicate: \* = *thiG* is not common in Archaea, and manual inspection revealed that positive hits were to pyrroloquinoline-quinone synthase; this false positive occurred only in this Archaea, as well as *Thermoplasma volcanium* (one sequence; not shown here); ^ = *Sinorhizobium meliloti* possesses a second truncated *thiG* sequence located on a plasmid - we presume the short *thiG* sequence does not lead to a fully functional ThiG protein.

| <i>IMG_taxid</i> | <i>Habitat</i> | <i>Kingdom</i> | <i>Species</i>                                  | <i>thiG</i> | <i>thi4</i> |
|------------------|----------------|----------------|-------------------------------------------------|-------------|-------------|
| 650716056        | Marine         | Archaea        | <i>Methanotorris igneus</i>                     | 0           | 2           |
| 650716079        | Marine         | Archaea        | <i>Pyrococcus sp. NA2</i>                       | 0           | 2           |
| 650716080        | Marine         | Archaea        | <i>Pyrococcus yayanosii</i>                     | 0           | 2           |
| 2511231148       | Marine         | Archaea        | <i>uncultured marine group II euryarchaeote</i> | 2*          | 0           |
| 2512564006       | Marine         | Bacteria       | <i>Octadecabacter arcticus</i>                  | 2           | 0           |
| 650716086        | Marine         | Bacteria       | <i>Sinorhizobium meliloti</i>                   | 2^          | 0           |

Table S5. Multiple B1-related transporters were detected in LMO metagenomes; their confirmed or predicted functions are included. Highlighted transporters were also detected in the LMO metagenomes, however, their respective protein models pickup proteins other than B1-related transporters and hence were not used in our analyses. \* = see PFAM protein family PF09084 (<http://pfam.xfam.org/family/PF09084>).

| <b>Transporter</b> | <b>Detected at LMO?</b> | <b>Function</b>                                                                                                                            |
|--------------------|-------------------------|--------------------------------------------------------------------------------------------------------------------------------------------|
| <i>thiPerm</i>     | Yes                     | Transporter of nucleobase or vitamin; Performed by cation symport - facilitated diffusion (6)                                              |
| <i>thiV</i>        | Yes                     | HMP transport; Possibly B1+HMP in select organisms; driven by electrochemical sodium gradient (6, 7)                                       |
| <i>thiB</i>        | Yes                     | B1 or phosphorylated B1 transporter; ATP-dependent transport (8)                                                                           |
| <i>omr1</i>        | Yes                     | TonB dependent transporter; H <sup>+</sup> gradient driven transport (9)                                                                   |
| <i>thiY</i>        | Yes                     | Pyrimidine precursor binding; Binds the formylaminopyrimidine N-formyl-4-amino-5-aminomethyl-2-methylpyrimidine (FAMP); ATP-dependent (10) |
| <i>ykoF</i>        | Yes                     | B1 and/or HMP transport; ATP-dependent (6, 11)                                                                                             |
| <i>cytX</i>        | No                      | Putative Hydroxymethylpyrimidine transporter (6)                                                                                           |
| <i>pnuC</i>        | No                      | Nicotinamide mononucleotide transport, some may function in B1 transport (12)                                                              |
| <i>thiT</i>        | No                      | B1 transporter; lower affinity for phosphorylated B1; energy coupling factor transport, ATP-dependent transport (13)                       |
| <i>thiW</i>        | No                      | Putative thiazole precursor transporter (6)                                                                                                |
| SSSP               | Yes                     | Broad family of sodium solute transporters; driven by electrochemical sodium gradient (14)                                                 |
| SSUA/Thi5/NMT1     | Yes                     | A broad family of pyrimidine precursor binding proteins-including biosynthesis proteins in prokaryotes and eukaryotes*                     |

Table S6. A summary of B1-related lifestyles and respective genotypes present amongst endemic LMO bacterioplankton as well as bacterioplankton isolates. \*= Transporter component *thiY* is implicated in B1 transport (15), but also pyrimidine precursor transport (6, 16). # = evidence presented in this study; ## = evidence provided in Table S11.

| <b><i>Auxotroph possessing a partial pathway, has thiamine monophosphate synthetase (thiE or thiN)</i></b> |                                                                     |                                                                                                                                                                                                                |
|------------------------------------------------------------------------------------------------------------|---------------------------------------------------------------------|----------------------------------------------------------------------------------------------------------------------------------------------------------------------------------------------------------------|
| <b><u>Lifestyle</u></b>                                                                                    | <b><u>Genotype</u></b>                                              | <b><u>Examples &amp; References</u></b>                                                                                                                                                                        |
| Pyrimidine Auxotroph                                                                                       | Missing <i>thiC</i>                                                 | Most bacterioplankton <sup>#</sup> ; <i>Pelagibacter ubique</i> HTCC1062 (7)                                                                                                                                   |
| Thiazole Auxotroph                                                                                         | Missing <i>thiG</i> (Bacteria) or <i>thi4</i> (Archaea)             | <i>Methylococcus capsulatus</i> <sup>##</sup> , others <sup>#</sup> ; White or pigmented isolates with unknown identity (17)                                                                                   |
| Dual Auxotroph                                                                                             | Missing <i>thiC</i> and <i>thiG</i> or <i>thi4</i>                  | <i>Rhodobacterales</i> <sup>#</sup> ; <i>Dokdonia</i> MED134 (9)                                                                                                                                               |
| <b><i>Auxotroph lacking thiamine monophosphate synthetase</i></b>                                          |                                                                     |                                                                                                                                                                                                                |
| <b><u>Lifestyle</u></b>                                                                                    | <b><u>Genotype</u></b>                                              | <b><u>Examples</u></b>                                                                                                                                                                                         |
| Thiamine Obligate Requirer                                                                                 | Missing <i>thiE</i> (Bacteria) or <i>thiN</i> (Archaea)             | <i>Cellvibrionales</i> , <i>Sphingobacterales</i> , and others <sup>#</sup> (17); <i>Pelagibacter sp.</i> , HIMB59 (7)                                                                                         |
| <b><i>Exogenous compound use</i></b>                                                                       |                                                                     |                                                                                                                                                                                                                |
| <b><u>Lifestyle</u></b>                                                                                    | <b><u>Genotype</u></b>                                              | <b><u>Examples</u></b>                                                                                                                                                                                         |
| Pyrimidine AmMP Scavenger                                                                                  | Possesses <i>tenA</i>                                               | <i>Pelagibacterales</i> <sup>#</sup> , <i>Actinobacteria</i> <sup>#</sup> , and Unclassified taxa <sup>#</sup> ; <i>Pelagibacterales sp.</i> IMCC9063 (7); White/pigmented isolates with unknown identity (17) |
| Pyrimidine Scavenger                                                                                       | Possesses <i>thiV</i> or <i>thiY</i>                                | <i>Pelagibacter ubique</i> HTCC1062 (7); <i>Alphaproteobacteria</i> <sup>#</sup>                                                                                                                               |
| Thiazole Precursor Scavenger                                                                               | Possesses <i>thiM</i>                                               | Unclassified Proteobacteria <sup>#</sup> ; <i>Roseobacter sp.</i> GIA101 and other diverse strains (18); White or pigmented isolates with unknown identity (17)                                                |
| Intact B1 Scavenger (including B1 prototrophs)                                                             | Possesses <i>thiB</i> ; <i>ThiPerm</i> ; <i>thiY</i> *; <i>omr1</i> | <i>Vibrio anguillarum</i> PF430-3 <sup>#</sup> ; <i>Pelagibacter sp.</i> HIMB59 (7); <i>Dokdonia</i> MED134 (9); Diverse lineages <sup>#</sup>                                                                 |

Table S7. Growth of *Vibrio anguillarum* PF430-3  $\Delta thiE$  upon addition of B1 and related compounds in B1-deplete medium. Positives indicate turbidity in triplicate cultures containing washed/resuspended cells (diluted 1:1000 at start of the survey). Negatives indicate no turbidity. AmMP = 4-amino-5-aminomethyl-2-methylpyrimidine; NEG CON = negative control, no compound addition.

| <i>1 nM additions</i> | $\Delta thiE$ |
|-----------------------|---------------|
| HMP                   | -             |
| B1                    | +             |
| HET                   | -             |
| NEG CON               | -             |

| <i>100 pM or 5 pM additions</i> | $\Delta thiE$ |
|---------------------------------|---------------|
| AmMP                            | -             |
| HMP                             | -             |
| B1                              | +             |
| HET                             | -             |
| NEG CON                         | -             |



Table S8. B1 and thiamine diphosphate (TDP) growth kinetics parameters for *Vibrio anguillarum* PF430-3  $\Delta thiE$ . Means and standard deviations are presented for half-saturation growth constants (Ks) and pmol cell<sup>-1</sup> values. CI = 95% confidence interval and Kmax = maximum saturation growth constant. Values for Ks, Ks CI, and r<sup>2</sup> are from a hyperbolic Michaelis-Menten model generated in Prism (GraphPad; La Jolla, CA); Kmax is estimated based on manual inspection of the plotted hyperbolic model.

| <b>Provided Vitamin</b> | <b>Ks (pM)</b> | <b>Ks (CI) (pM)</b> | <b>r<sup>2</sup></b> | <b>pmol cell<sup>-1</sup></b> | <b>Kmax (pM)</b> | <b>n</b> |
|-------------------------|----------------|---------------------|----------------------|-------------------------------|------------------|----------|
| B1                      | 0.51 ± 0.13    | 0.25 - 0.77         | 0.83                 | 2.88E-09 ± 1.05E-09           | ~14              | 20       |
| TDP                     | 1.38 ± 0.29    | 0.78 - 1.98         | 0.89                 | 4.66E-09 ± 1.05E-09           | ~11              | 16       |

Table S9. Nutrient components added to cFMSW for B1-auxotrophy surveys of Baltic Sea bacterioplankton isolates.

| <i>Nutrient</i>                                 | <i>Final Concentration (mM)</i> |
|-------------------------------------------------|---------------------------------|
| Glucose                                         | 5.53E-01                        |
| KH <sub>2</sub> PO <sub>4</sub>                 | 1.48E-01                        |
| (NH <sub>4</sub> ) <sub>2</sub> SO <sub>4</sub> | 2.50E-01                        |
| NaNO <sub>3</sub>                               | 2.50E-01                        |
| Trace Metals                                    | Farnelid et al. 2013 (19)       |
| Cobalamin                                       | Farnelid et al. 2013 (19)       |
| 7 Vitamin Mix                                   | Farnelid et al. 2013 (19)       |
| Biotin                                          | 6.67E-04                        |
| Myo-inositol                                    | 6.00E-03                        |
| Niacin                                          | 1.90E-02                        |
| L-Methionine                                    | 3.70E-02                        |
| Glycine                                         | 7.40E-02                        |
| Pyruvate                                        | 6.20E-02                        |
| Riboflavin                                      | 2.60E-03                        |

Table S10. Maximum cell yields of PF430-3  $\Delta thiE$  in bioassays of LMO water. Yields from no B1 addition (0 pM) and added B1 (1, 2, 3, and 5 pM) were used to generate an internal standard curve (Equation) and ultimately calculate the starting B1 concentration in the initially collected LMO water (Table 1), based on PF430-3  $\Delta thiE$  yields per supplemented B1 (see Methods in the main text). Mean maximum yields in negative controls (growth on B1-deplete medium) (Neg. control) were subtracted from all other yields before calculating the internal standard curve.

|                     | 5/12/15                                  |             |             | 5/26/15                                  |             |             | 6/24/15                                 |             |             |
|---------------------|------------------------------------------|-------------|-------------|------------------------------------------|-------------|-------------|-----------------------------------------|-------------|-------------|
| <i>pM added</i>     | <i>Rep1</i>                              | <i>Rep2</i> | <i>Rep3</i> | <i>Rep1</i>                              | <i>Rep2</i> | <i>Rep3</i> | <i>Rep1</i>                             | <i>Rep2</i> | <i>Rep3</i> |
| 0                   | 1.24E+05                                 | 1.07E+05    | 8.13E+04    | 3.29E+05                                 | 5.04E+05    | 6.92E+05    | 1.36E+05                                | 2.10E+05    | 1.52E+05    |
| 1                   | 3.31E+05                                 | 2.76E+05    | 3.13E+05    | 6.97E+05                                 | 6.19E+05    | 6.85E+05    | 3.00E+05                                | 4.01E+05    | 2.36E+05    |
| 2                   | 4.75E+05                                 | 4.00E+05    | 5.79E+05    | 1.12E+06                                 | 6.82E+05    | 6.79E+05    | 2.48E+05                                | 2.67E+05    | 4.52E+05    |
| 3                   | 5.03E+05                                 | 4.69E+05    | 4.21E+05    | 1.11E+06                                 | 9.90E+05    | 9.07E+05    | 5.52E+05                                | 5.53E+05    | 5.04E+05    |
| 5                   | 7.22E+05                                 | 8.39E+05    | 7.96E+05    | 1.45E+06                                 | 1.24E+06    | 1.63E+06    | -                                       | 1.36E+06    | 1.51E+06    |
| <b>Neg. Control</b> | 4.32E+04                                 | 4.84E+04    | 4.01E+04    | 4.32E+04                                 | 4.84E+04    | 4.01E+04    | 2.49E+04                                | 3.92E+04    | 2.82E+04    |
| <b>Equation</b>     | $y = 7.171E-06x - 0.8777; r^2 = 0.90965$ |             |             | $y = 4.486E-06x - 1.7911; r^2 = 0.83354$ |             |             | $y = 3.548E-06x + 0.2579; r^2 = 0.8151$ |             |             |
|                     | 8/4/15                                   |             |             | 6/1/16                                   |             |             |                                         |             |             |
| <i>pM added</i>     | <i>Rep1</i>                              | <i>Rep2</i> | <i>Rep3</i> | <i>Rep1</i>                              | <i>Rep2</i> | <i>Rep3</i> |                                         |             |             |
| 0                   | 2.82E+05                                 | 2.67E+05    | 2.76E+05    | 5.42E+05                                 | 5.12E+05    | 5.82E+05    |                                         |             |             |
| 1                   | 3.96E+05                                 | 4.06E+05    | 3.74E+05    | 7.15E+05                                 | 8.04E+05    | 8.55E+05    |                                         |             |             |
| 2                   | 4.40E+05                                 | 6.02E+05    | 6.68E+05    | 1.01E+06                                 | 1.18E+06    | 8.61E+05    |                                         |             |             |
| 3                   | 9.51E+05                                 | 8.02E+05    | 7.84E+05    | 1.14E+06                                 | 1.31E+06    | 1.32E+06    |                                         |             |             |
| 5                   | 1.12E+06                                 | 1.59E+06    | 1.55E+06    | 1.27E+06                                 | 1.48E+06    | 1.44E+06    |                                         |             |             |
| <b>Neg. Control</b> | 8.26E+04                                 | 9.98E+04    | 1.22E+05    | 1.53E+05                                 | 6.41E+04    | 7.47E+04    |                                         |             |             |
| <b>Equation</b>     | $y = 3.881E-06x - 0.5151; r^2 = 0.907$   |             |             | $y = 5E-06x - 2.8371; r^2 = 0.870$       |             |             |                                         |             |             |

Table S11. A list of thiazole B1-auxotrophic bacterioplankton identified in our survey of 330 complete bacterioplankton genomes, based on the absence of *thiG* or *thi4* genes.

| IMG_taxid  | Habitat | Kingdom  | Species                          |
|------------|---------|----------|----------------------------------|
| 2506520034 | Fresh   | Archaea  | <i>Halopiger xanaduensis</i>     |
| 2510065051 | Fresh   | Archaea  | <i>Halostagnicola larsenii</i>   |
| 2510461022 | Fresh   | Archaea  | <i>Natronobacterium gregoryi</i> |
| 637000166  | Fresh   | Bacteria | <i>Methylococcus capsulatus</i>  |
| 640753014  | Fresh   | Archaea  | <i>Methanoregula boonei</i>      |
| 641522637  | Fresh   | Bacteria | <i>Lysinibacillus sphaericus</i> |
| 642555136  | Fresh   | Bacteria | <i>Leptospira biflexa</i>        |
| 642555137  | Fresh   | Bacteria | <i>Leptospira biflexa</i>        |
| 644736372  | Marine  | Archaea  | <i>Halomicrobium mukohataei</i>  |
| 644736380  | Marine  | Bacteria | <i>Kytococcus sedentarius</i>    |

#### SI Datasets (separate files).

Dataset S1. Bacterioplankton strains that are putative dual B1 auxotrophs based on the absence of *thiC* and *thiG/thi4* from their complete genome reference sequence. \*= one hit to *thiDN* fusion ~400-450 amino acids long; all others are annotated in UNIPROT as: transcriptional regulator, uncharacterized protein, or DNA binding protein; \*\* = all are annotated in UNIPROT as: transcriptional regulator, uncharacterized protein, or DNA binding protein; \*\*\*= hits annotated as AIR synthase, not thiamine monophosphate; # = a truncated *thiDN* protein, unclear if it is comparably functional. Detected genes are highlighted in blue.

Dataset S2. Of 330 complete isolate genomes surveyed, 109 possessed >1 copy of *thiE* or *thiN* (encoding for thiamine monophosphate synthase) and are highlighted in blue. Non-highlighted strains were conservatively not counted as having >1 thiamine synthase gene due to cryptic positive hits. \*= one hit to *ThiDN* fusion ~400-450 AA long; when >1 others are annotated in UNIPROT as transcriptional regulator, uncharacterized protein, or DNA binding protein; \*\* = all annotated in UNIPROT as: transcriptional regulator, uncharacterized protein, or DNA binding protein; \*\*\* = annotated in UNIPROT as AIR synthase, not thiamine monophosphate; # = a truncated *ThiDN* protein was detected, unclear if it is comparably functional; ^ = one hit is annotated as Nudix hydrolase – its function as a thiamine monophosphate synthase is unclear.

Dataset S3. Isolate bacterioplankton genomes possessing >1 known B1 or precursor transporter (Table S3). The number of each transporter detected is highlighted in yellow.

Dataset S4. B1-prototrophic bacterioplankton isolates possessing at least one known B1-related transporter. Detected core B1-biosynthesis genes are highlighted in blue, while detected transporters are highlighted in yellow.

Dataset S5. A list of complete bacterioplankton genomes retrieved from the Joint Genome Institute (JGI) Genome Portal (<https://genome.jgi.doe.gov/>) used in surveys for B1-related proteins.

Dataset S6. Bacterial production data from nutrient-amendment experiments performed using near-surface LMO water. Means and standard deviations are in units of  $\mu\text{gC L}^{-1} \text{d}^{-1}$ . Conversion factors used to calculate final bacterial production values are provided in the methods section of the main text. P-values are those from two-tailed Welch-Corrected t-tests between control and individual treatment data.

## References

1. Hugerth LW, et al. (2015) Metagenome-assembled genomes uncover a global brackish microbiome. *Genome Biol* 16:279.
2. Kumar S, Stecher G, Tamura K (2016) MEGA7: Molecular Evolutionary Genetics Analysis Version 7.0 for Bigger Datasets. *Mol Biol Evol* 33(7):1870–1874.
3. Zuckerkandl E, Pauling L (1965) *Evolutionary divergence and convergence in proteins* eds Bryson V, Vogel HJ (Academic Press, New York, NY).
4. Zehr JP, Weitz JS, Joint I (2017) How microbes survive in the open ocean. *Science* 357(6352):646–647.
5. Monteverde DR, et al. (2015) Vitamin B1 in marine sediments: pore water concentration gradient drives benthic flux with potential biological implications. *Front Microbiol* 6:434.
6. Rodionov DA, Vitreschak AG, Mironov AA, Gelfand MS (2002) Comparative genomics of thiamin biosynthesis in procaryotes. New genes and regulatory mechanisms. *J Biol Chem* 277(50):48949–48959.
7. Carini P, et al. (2014) Discovery of a SAR11 growth requirement for thiamin's pyrimidine precursor and its distribution in the Sargasso Sea. *ISME J* 8:1727–1738.
8. Webb E, Claas K, Downs D (1998) *thiBPQ* Encodes an ABC transporter required for transport of thiamine and thiamine pyrophosphate in *Salmonella typhimurium*. *J Biol Chem* 273(15):8946–8950.
9. Gómez-Consarnau L, et al. (2016) Proteorhodopsin light-enhanced growth linked to vitamin-B1 acquisition in marine Flavobacteria. *ISME J* 10(5):1102–1112.
10. Jenkins AH, Schyns G, Potot S, Sun G, Begley TP (2007) A new thiamin salvage pathway. *Nat Chem Biol* 3(8):492–497.
11. Devedjiev Y, et al. (2004) The structure and ligand binding properties of the B. subtilis YkoF gene product, a member of a novel family of thiamin/HMP-binding proteins. *J Mol Bio* 343(2):395–406.
12. Kang I, Kim S, Islam MR, Cho J-C (2017) The first complete genome sequences of the acI lineage, the most abundant freshwater Actinobacteria, obtained by whole-genome-amplification of dilution-to-extinction cultures. *Sci Rep* 7:42252.
13. Erkens GB, Slotboom DJ (2010) Biochemical characterization of ThiT from *Lactococcus lactis*: a thiamin transporter with picomolar substrate binding affinity.

*Biochemistry* 49(14):3203–3212.

14. Reizer J, Reizer A, Saier MH (1994) A functional superfamily of sodium/solute symporters. *Biochim Biophys Acta* 1197(2):133–166.
15. Rodionova IA, et al. (2015) Genomic distribution of B-vitamin auxotrophy and uptake transporters in environmental bacteria from the Chloroflexi phylum. *Environ Microbiol Rep* 7(2):204–210.
16. Bale S, Rajashankar KR, Perry K, Begley TP, Ealick SE (2010) HMP binding protein ThiY and HMP-P synthase THI5 are structural homologues. *Biochemistry* 49(41):8929–8936.
17. Burkholder PR, Lewis S (1968) Some patterns of B vitamin requirements among neritic marine bacteria. *Can J Microbiol* 14(5):537–543.
18. Paerl RW, et al. (2017) Use of plankton-derived vitamin B1 precursors, especially thiazole-related precursor, by key marine picoeukaryotic phytoplankton. *ISME J* 11(3):753–765.
19. Farnelid H, et al. (2013) Active nitrogen-fixing heterotrophic bacteria at and below the chemocline of the central Baltic Sea. *ISME J* 7(7):1413–1423.
